# Supplementary material for: Bayesian Spatiotemporal Modeling of Routinely Collected Data to Assess the Effect of Health Programs in Malaria Incidence During Pregnancy in Burkina Faso
Source: PubMed Central journal article supplement (PMC7021681; doi:10.1038/s41598-020-58899-3), 2020-02-14

## **Bayesian Spatiotemporal Modeling of Routinely Collected Data to Assess the Effect of Health Programs in Malaria Incidence During Pregnancy in Burkina Faso**

**Toussaint Rouamba<sup>1,2</sup>, Sekou Samadoulougou<sup>3,4</sup>, Halidou Tinto<sup>1</sup>, Victor A. Alegana<sup>5,6</sup>, and Fati Kirakoya-Samadoulougou<sup>2</sup>**

1 Clinical Research Unit of Nanoro, Institute for Research in Health Sciences, National Center for Scientific and Technological Research, 528, Avenue Kumda-Yoore, BP 218 Ouagadougou CMS 11, Ouagadougou, Burkina Faso

2 Center for research in epidemiology, Biostatistics and Clinical Research, School of Public Health, University libre de Bruxelles (ULB), Route de Lennik, 808 B-1070 Bruxelles. Brussels, Belgium

3 Centre for Research on Planning and Development (CRAD), Laval University, Quebec, G1V 0A6, Canada

4 Evaluation Platform on Obesity Prevention, Quebec Heart and Lung Institute, Quebec, G1V 4G5, Canada.

5. Kenya Medical Research Institute - Wellcome Trust Research Programme, P.O. Box 43640-00100, Nairobi, Kenya

6. Geography and Environmental Science, University of Southampton, SO17 1BJ Southampton, UK

\*Correspondence to [rouambatoussaint@gmail.com](mailto:rouambatoussaint@gmail.com)

### **Supplementary Information 4**

**Figure S2.** Malaria in pregnancy, Rainfall and Temperature time series description from 2015 to 2017 in Burkina Faso

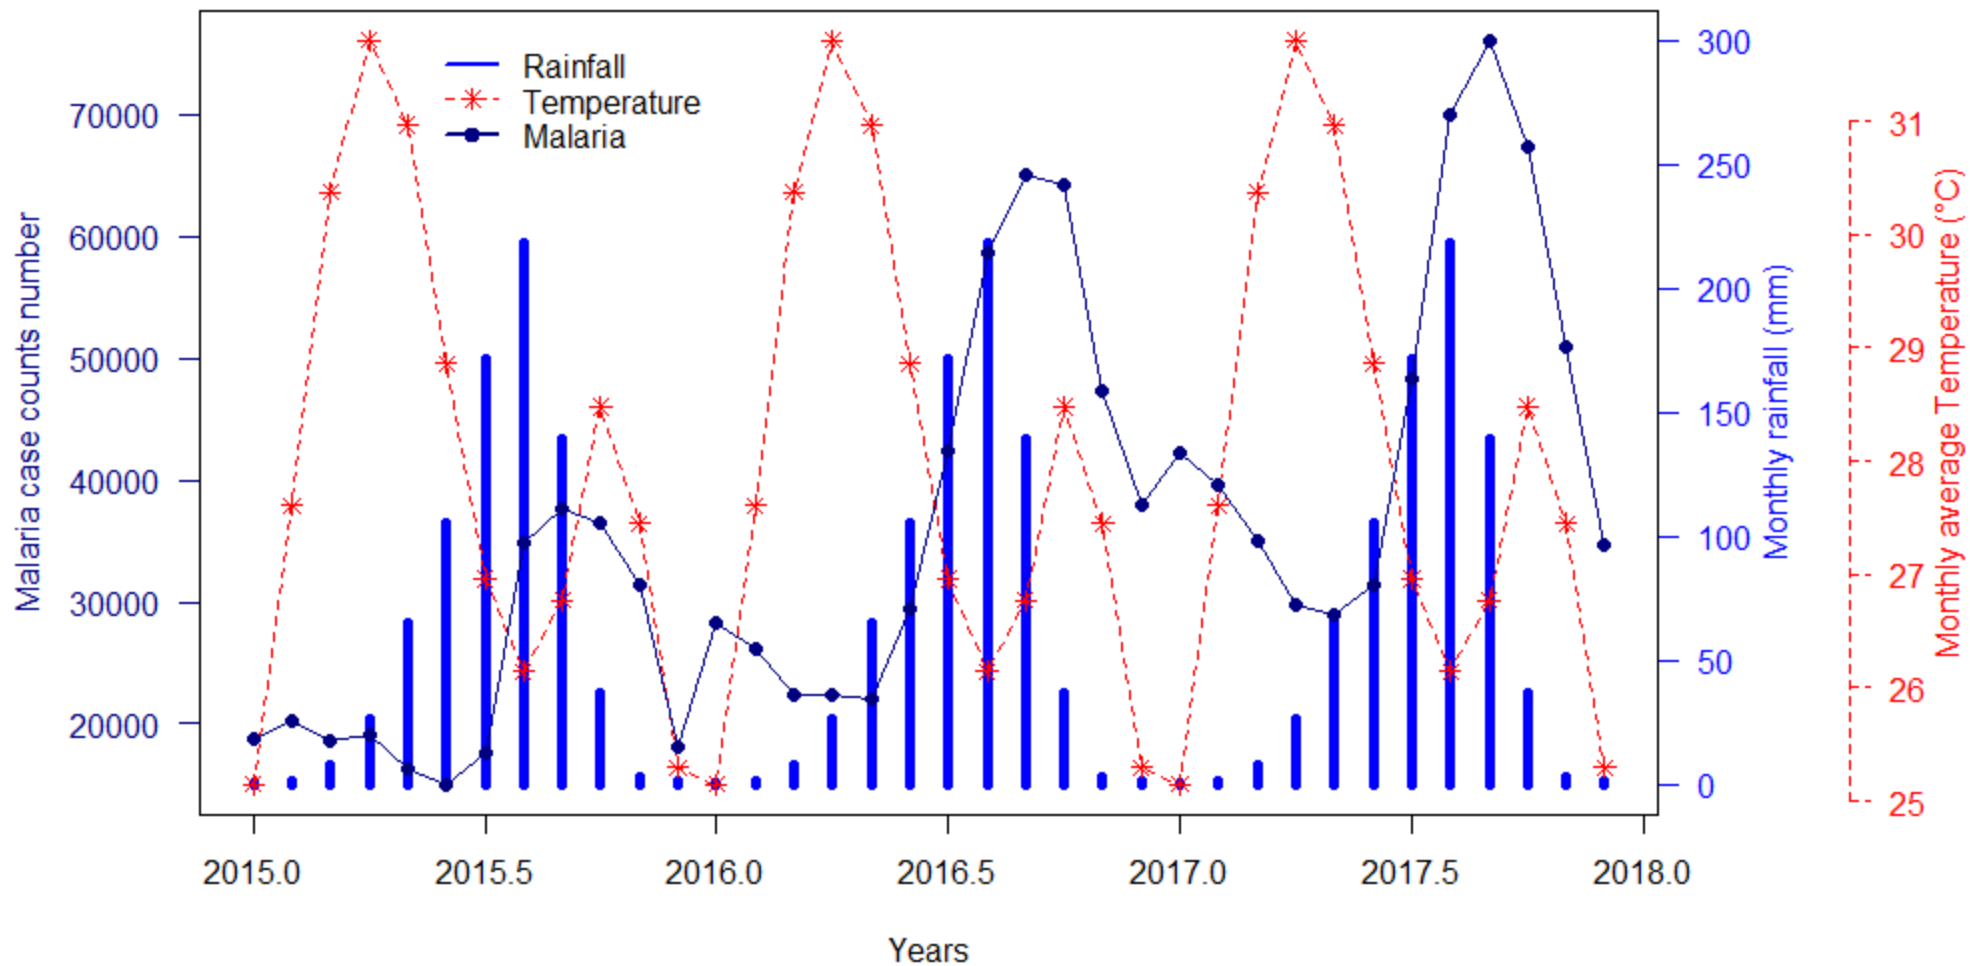

Supplement: 41598_2020_58899_MOESM4_ESM.pdf [file 41598_2020_58899_MOESM4_ESM.pdf]
